# Supplementary material for: Bet-hedging strategies in expanding populations
Source: PubMed Central journal article supplement (PMC6490941; doi:10.1371/journal.pcbi.1006529), 2019-04-18
Supplement: pcbi.1006529.s001.pdf [file pcbi.1006529.s001.pdf]

# Supporting information: Bet-hedging strategies in expanding populations

Paula Villa Martín

*Biological Complexity Unit, Okinawa Institute of Science and  
Technology Graduate University, Onna, Okinawa 904-0495, Japan*

Miguel A. Muñoz

*Departamento de Electromagnetismo y Física de la Materia and Instituto Carlos I de Física Teórica y Computacional,  
Facultad de Ciencias, Universidad de Granada, 18071 Granada, Spain*

Simone Pigolotti\*

*Biological Complexity Unit, Okinawa Institute of Science and  
Technology Graduate University, Onna, Okinawa 904-0495, Japan.*

(Dated: April 2, 2019)

## NUMERICAL INTEGRATION OF THE STOCHASTIC FISHER EQUATION

In this section we describe in details the methods for the integration of the wave equations of the two-phenotype model used for simulations in the Main Text.

### Fisher wave

We consider the Fisher equation

$$\dot{f}(x, t) = D\nabla^2 f(x, t) + \sigma(x, t)f(x, t)(1 - f(x, t)), \quad (1)$$

where  $f(x, t)$  is the population density at space  $x$  and time  $t$ , and  $\sigma(x, t)$  is the local growth rate.

We employ a finite-difference fourth-order Runge-Kutta method. The systems is initialized by fixing  $f(x_i, 0) = 1$  for  $i \in (0, 50)$  and  $f(x, t) = 0$  for  $i > 50$ . The spatial mesh  $dx$  is fixed by means of an adaptive routine. We initialize the routine with an initial guess  $dx = 0.14$ . Then

1. We let the system evolve until the front reaches a stationary state.
2. We compute the smallest values of  $x$  for which  $f(x, t) > \theta$  for  $\theta = 3/4$  and  $\theta = 1/4$ . We denote these two values as  $x_{3/4}$  and  $x_{1/4}$  respectively.
3. We measure the precisions  $\Delta f_{3/4} = f(x_{3/4} - dx) - f(x_{3/4})$ ,  $\Delta f_{1/4} = f(x_{1/4} - dx) - f(x_{1/4})$ .
4. If  $\Delta f_{3/4} > 0.01$  and  $\Delta f_{1/4} > 0.01$ , then  $dx$  is accepted as a valid increment.
5. Otherwise, the system is reset to the initial condition and the routine is again run for  $dx = d\tilde{x} - 0.01$ ; being  $d\tilde{x}$  the previous spatial mesh.

Once  $dx$  is determined,  $dt$  is fixed following the Courant-Friedrichs-Lewy condition for an explicit integration method [1]:

$$\frac{v_{\max} dt}{dx} \leq 1 \quad (2)$$

---

\* simone.pigolotti@oist.jp

being  $v_{\max}$  the estimated maximum velocity of the wave. We fix  $v_{\max} = 100$ , which is sufficiently large compared to velocities in our simulations.

Temporal environmental switch is numerically implemented with a simple first-order algorithm. At the beginning of each time step, the state of environment is switched with probability  $k dt$ . We verified that this quantity is always sufficiently small, so that the first-order algorithm yields reliable results. A similar algorithm is implemented for spatial environmental variations to sequentially assign an environmental state to each lattice site.

### Stochastic Fisher wave

We consider the stochastic Fisher equation [2]

$$\dot{f}(x, t) = D\nabla^2 f + \sigma(t)f(1 - f) + \sqrt{\frac{2}{N}}f(1 - f)\xi(x, t) \quad (3)$$

where  $\xi(x, t)$  a Gaussian white noise satisfying  $\langle \xi(x, t) \rangle = 0$  and  $\langle \xi(x, t)\xi(x', t') \rangle = \delta(x - x')\delta(t - t')$ . For later convenience, we define the noise amplitude  $\gamma(t) \equiv \sqrt{\frac{2}{N}f(t)(1 - f(t))}$ .

Numerical integration in the presence of noise is subtle. In particular, one has to figure out how to deal with the unphysical values  $f(x, t) < 0$  and  $f(x, t) > 1$  that can result due to finite numerical precision. Depending on parameter range, the naive replacement  $f(x, t) = 0$  or  $f(x, t) = 1$  when  $f(x, t) < 0$  and  $f(x, t) > 1$ , respectively, may introduce a substantial bias. In particular, an incorrect integration of  $f(x, t)$  at the front, where  $f(x, t)$  is small, might lead to an large error in the estimated velocity. However, when  $f(x, t)$  is small so that  $\gamma(t) \simeq \sqrt{\frac{2}{N}f(t)}$ , this problem can be circumvented by integrating the noise term exactly [3], while integrating the rest of the equation deterministically [4].

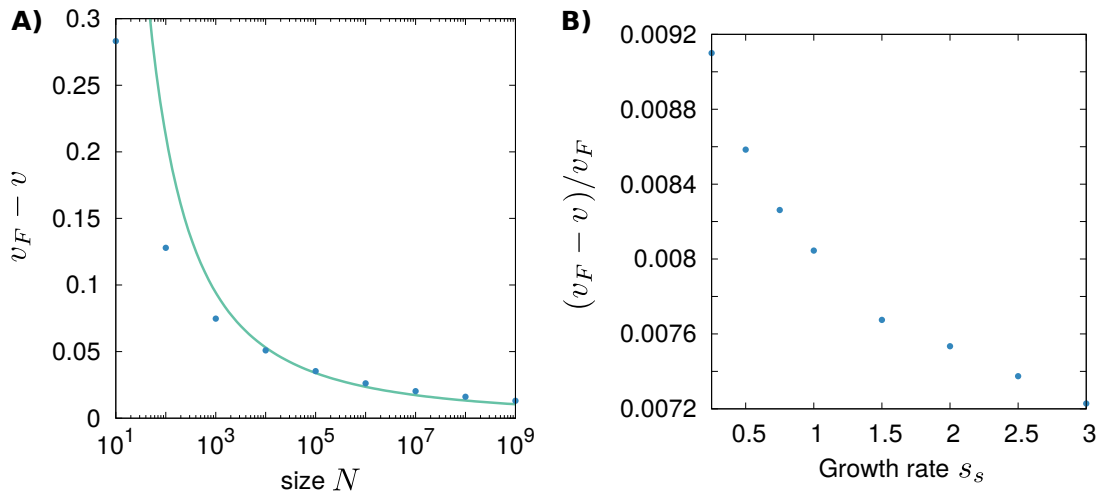

FIG. 1. **Size scaling and maximum error estimation for our integration method.** Panel A) shows the curve  $4.5(\log N)^{-2}$  and the difference  $v_F - v$  for  $k = 0$ ,  $\alpha = 0$ ,  $s_s = 1$ , and different system sizes. Panel B) shows  $(v_F - v)/v_F$  for  $N = 10^9$  and different growth rates employed in this work. These results suggest that our integration method is precise and have a maximum error of 0.0018%.

We follow this strategy and integrate the equation mixing two different algorithms, depending on the local value of  $f(x, t)$ :

- If  $f(x, t) > \theta$ : we employ the Milstein method (order 1). Defining  $\beta(t) \equiv D\nabla^2 f(t) + \sigma(t)f(t)(1 - f(t))$ , the local field is updated according to the rule

$$f(x, t + dt) = f(x, t) + \beta(t)dt + \gamma(t)\Delta + \frac{1}{2}\gamma(t)\frac{\partial\gamma}{\partial f(t)}(\Delta^2 - dt) \quad (4)$$

being  $\Delta = \sqrt{dt}g(t)$ , where  $g(t)$  is a Gaussian random variable with zero mean and unit variance, drawn independently at each time step.

• If  $f(x, t) < \theta$  we employ a split-step numerical integration:

1. *Non-linear and diffusion terms.* The term  $\dot{f}(x, t) = D\nabla^2 f - \sigma(t)f^2$  is integrated by means of the Runge-Kutta method obtaining a first solution  $f^*$ .
2. *Linear and stochastic terms.* The term  $\sigma(t)f + \sqrt{\frac{2}{N}}f\xi(x, t)$  is integrated in an exact way, see [3]:

$$f(x, t) = r_{\text{Gamma}}\{r_{\text{Poisson}}\{\lambda f^*(x, t)e^{\sigma(t)t}\}\}/\lambda. \quad (5)$$

being  $\lambda = 2\sigma(t)/[\gamma^2 e^{\sigma(t)t}]$ , and  $r_{\text{Gamma}}$ ,  $r_{\text{Poisson}}$  random variables from Gamma and Poisson probability distributions respectively, i.e.  $\text{Prob}[r_{\text{Gamma}}(a) = z] = z^{a-1}e^{-z}/\Gamma[a]$  and  $\text{Prob}[r_{\text{Poisson}}(a) = z] = a^z e^{-a}/z!$ .

To check the precision of our method we integrated the stochastic equation (3) for  $k = 0$ ,  $\alpha = 0$ , and different growth rates  $s_s$  and compared the results to the analytical Fisher velocity  $v_F = 2\sqrt{D}s_s$ . For large population size  $N$ , the velocity  $v$  of the wave asymptotically goes as  $v_F - v \simeq C \ln^{-2}(N)$  [5]. Our numerical integration is consistent with this asymptotic relation from  $N \simeq 10^4$  (figure 1A) with a root-mean-square deviation of 0.002. We have also obtained the values  $(v_F - v)/v_F$  for the different growth rates employed in this work to obtain an estimation of the maximum error (see figure 1B). Note that  $v_F$  is not the actual velocity of the finite system, so the relative error  $(v_F - v)/v_F$  is, in fact, smaller. The maximum error is around 0.9%, that, considering the results of figure 1A) leads to an overestimated error of about 0.0018%.

- 
- [1] Richard Courant, Kurt Friedrichs, and Hans Lewy, "On the partial difference equations of mathematical physics," IBM journal of Research and Development **11**, 215–234 (1967).
  - [2] Kirill S Korolev, Mikkel Avlund, Oskar Hallatschek, and David R Nelson, "Genetic demixing and evolution in linear stepping stone models," Reviews of modern physics **82**, 1691 (2010).
  - [3] Ivan Dornic, Hugues Chaté, and Miguel A Munoz, "Integration of langevin equations with multiplicative noise and the viability of field theories for absorbing phase transitions," Physical review letters **94**, 100601 (2005).
  - [4] Haim Weissmann, Nadav M Shnerb, and David A Kessler, "Simulation of spatial systems with demographic noise," Physical Review E **98**, 022131 (2018).
  - [5] Éric Brunet and Bernard Derrida, "Effect of microscopic noise on front propagation," Journal of Statistical Physics **103**, 269–282 (2001).
